# Supplementary material for: Scenarios of Genes-to-Terpenoids Network Led to the Identification of a Novel α/β-Farnesene/β-Ocimene Synthase in Camellia sinensis
Source: PubMed Central journal article supplement (PMC7013532; doi:10.3390/ijms21020655), 2020-01-19
Supplement: ijms-21-00655-s001.pdf [file ijms-21-00655-s001.pdf]

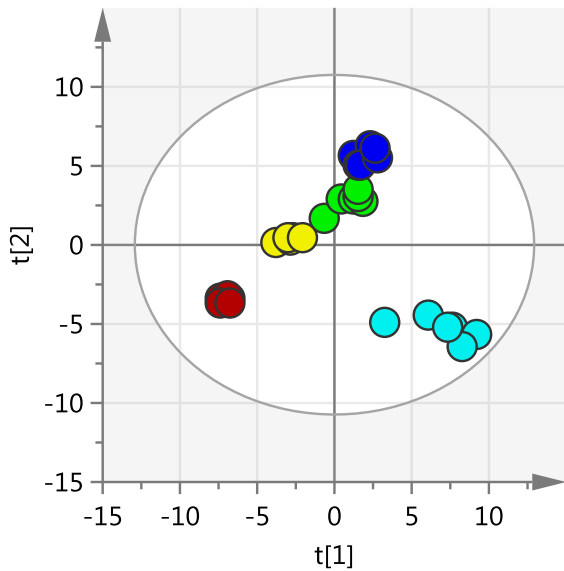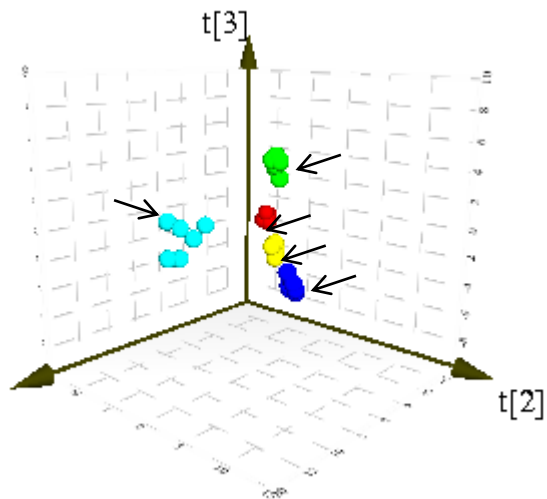

$$R^2X[1]=0.375; R^2X[2]=0.258$$

**Supplemental Figure 1.** Principle Component Analysis for metabolites from different leaves and stem

**Supplemental Table S1:** Number of reads get from five tissues of tea plants and quality of transcriptome sequencing

| Sample | Number of reads | GC% | Q20%     | Q30%     |
|--------|-----------------|-----|----------|----------|
| Bud-1  | 33833529        | 42  | 0.999782 | 0.97464  |
| Bud-2  | 38754301        | 43  | 0.999762 | 0.974404 |
| FL-1   | 25833070        | 42  | 0.999802 | 0.966952 |
| FL-2   | 26044289        | 42  | 0.999812 | 0.968461 |
| ML-1   | 31705267        | 47  | 0.999766 | 0.965772 |
| ML-2   | 25758852        | 44  | 0.999814 | 0.968212 |
| SL-1   | 29076645        | 42  | 0.999827 | 0.968581 |
| SL-2   | 27800431        | 42  | 0.999794 | 0.96766  |
| Stem-1 | 30996807        | 43  | 0.999819 | 0.968278 |
| Stem-2 | 26347796        | 43  | 0.999807 | 0.96791  |
| Total  | 148075493.5     |     |          |          |

**Supplemental Table S2: Primers used for q-PCR in this study**

| <b>Gene</b>  | <b>Forward Primer</b>    | <b>Reverse Primer</b> |
|--------------|--------------------------|-----------------------|
| contig17153  | CAGGAAACCCACTCTTCCAA     | CTTCTTCCCCAAAAACGACA  |
| contig31251  | TCCGAGTTCGTGAGTGTCAG     | GAAGTCCTTTGCCCCATACC  |
| contig90401  | AATCGAGCAGATTTGCAAGG     | TTCCCAGAGATGCCGATTAC  |
| contig58508  | CCTTCCACTCTTCGTCCTGA     | GGTCTCAAGCTCCGCAATTA  |
| contig60663  | TGGCCTTTTCGAGGTCTATTG    | TTCTGTCCATACCGAGCTGTC |
| contig1798   | TTCTAACCTGCCCACTCCAC     | GAATCCATGGAAGCCTTTGA  |
| contig3467   | TTCCTGACCACCCTCGTTAG     | AGCACTTCACCTCCTGATGC  |
| contig133399 | TCTTACTCTACACGACGCTCTTCC | TTGGGTTGTTCTTCACAGAGC |
| contig11606  | GACAGGATTGGAGCCGTAAA     | AAAGAGCCGAGAGGAGGAAG  |
| contig6307   | ATTGTCCGTCTTCCATGCTC     | GTGGAGCACCTCAAACATCC  |
| contig45761  | GGGATGAGGGAGACCAAAT      | CAAACCTCCCTTCCACCTCAA |
| contig28019  | CAACAGAGGAGTCTGCACCA     | CTTTAGGGCTTCCCGACATT  |

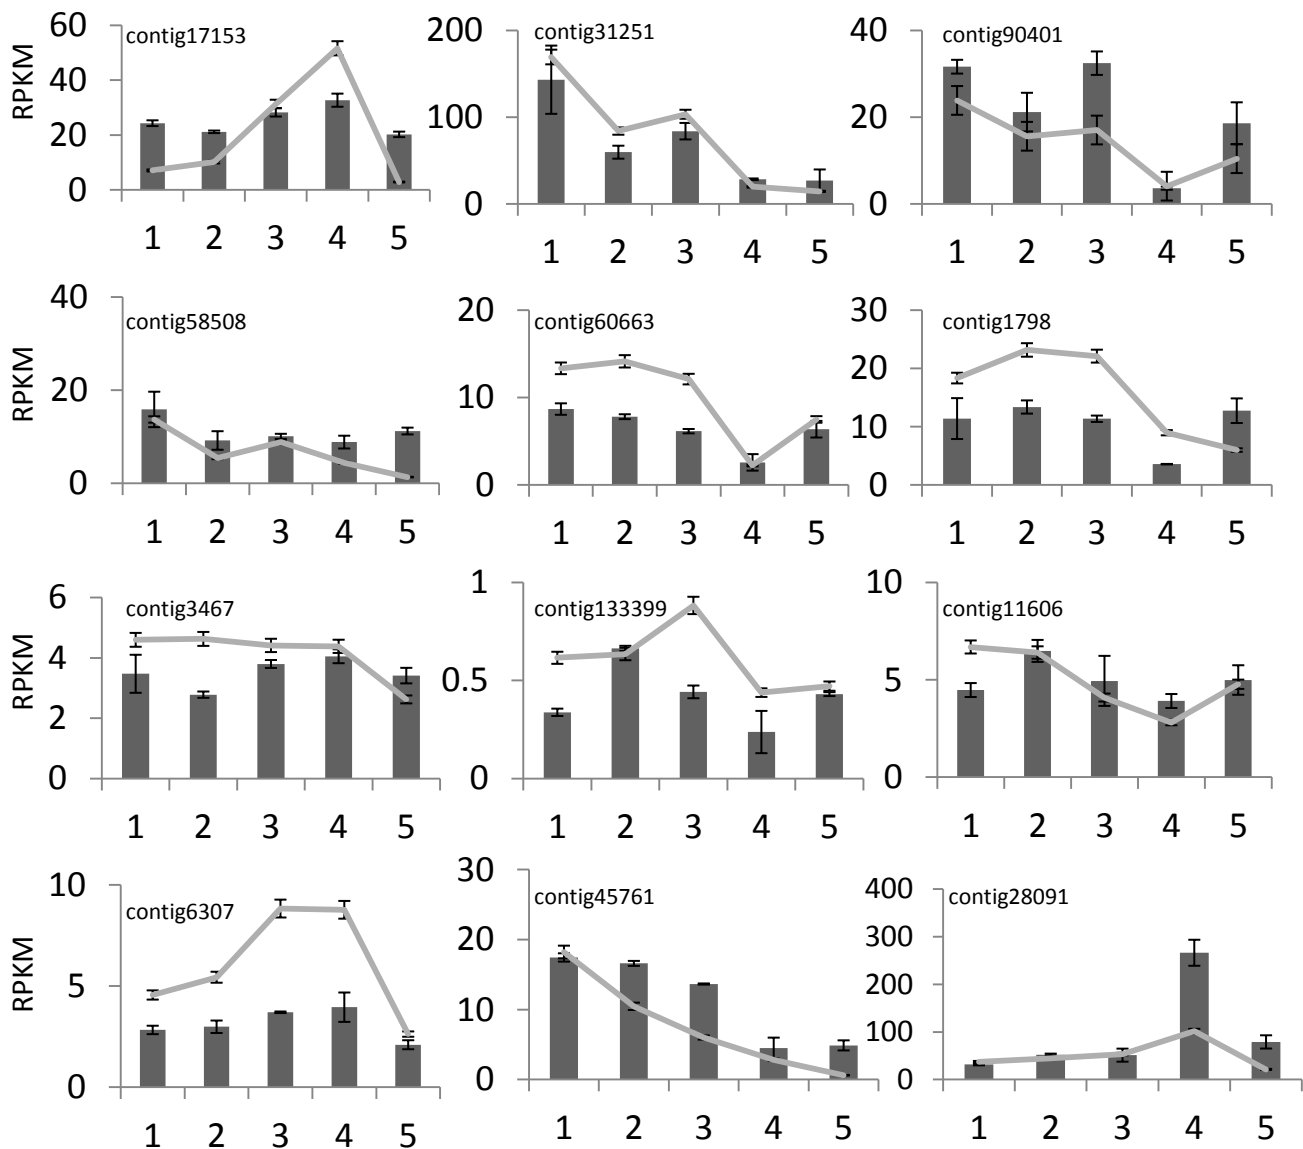

**Supplemental Figure 2.** Q-PCR results showing that the expression patterns of the 12 genes were in accordance with those of RNA-Seq. 1, 2, 3, 4, 5 means Bud, FL, SL, ML and Stem respectively.
